# Supplementary material for: A facile approach to silica-modified polysulfone microfiltration membranes for oil-in-water emulsion separation
Source: Royal Society of Chemistry journal article supplement (doi:10.1039/c6ra07929f), 2016-01-01
Supplement: c6ra07929f1.pdf [file c6ra07929f1.pdf]

## Supporting Information

### **A Facile Approach to Silica-Modified Polysulfone Microfiltration Membranes for Oil-in-Water Emulsion Separation**

Qiao-Ling Gao<sup>a</sup>, Fei Fang<sup>a</sup>, Chen Chen<sup>a</sup>, Xue-Yan Zhu<sup>a</sup>, Jing Li<sup>a</sup>, Hong-Ying Tang<sup>b,\*\*</sup>,  
Zhong-Biao Zhang<sup>b</sup> and Xiao-Jun Huang<sup>a,\*</sup>

<sup>a</sup> MOE Key Laboratory of Macromolecular Synthesis and Functionalization,  
Department of Polymer Science and Engineering, Zhejiang University, Hangzhou  
310027, China

<sup>b</sup> Tianjin Key Laboratory of Water Resources and Environment, Tianjin Normal  
University, Tianjin 300387, China

\*Corresponding author. E-mail: [hxjzxh@zju.edu.cn](mailto:hxjzxh@zju.edu.cn)

\*\*Corresponding author. E-mail: [hytang@mail.tjnu.edu.cn](mailto:hytang@mail.tjnu.edu.cn)

## **Supplementary Figure Captions:**

**Table S1** Surface compositions (in atomic percentage) of these SiO<sub>2</sub>-decorated RGM-PSF surfaces prepared from different rinse times.

**Figure S1** Schematic diagram of the experimental setup for dead-end filtration.

**Figure S2** Particle size distribution of the diesel-in-water emulsion.

**Figure S3** Sketch of pressure-flow rate curve and variation in the pore size distribution with diameter for the blank RGM-PSF measured by LLP.

**Figure S4** XPS spectra and corresponding Si 2p peaks of the silica-modified RGM-PSF surfaces prepared from different rinse times.

**Figure S5** Sketch of pressure-flow rate curve and variation in the pore size distribution with diameter for the SiO<sub>2</sub>-decorated RGM-PSF measured by LLP.

**Figure S6** Variation in the pore size distribution with diameter for the blank (left) and silica-modified (right) RGM-PSF measured by image pro plus.

**Figure S7** Pure water flux of the blank and SiO<sub>2</sub>-decorated RGM-PSF, at the operating pressures of 0.05 and 0.10 MPa, respectively.

**Figure S8** Change in the water contact angle with time and decreased rate for the blank and SiO<sub>2</sub>-decorated RGM-PSF.

**Figure S9** Rejection of diesel-in-water emulsion with increasing pressure for the blank and SiO<sub>2</sub>-decorated RGM-PSF detected by infrared spectrophotometry.

---

| <b>Sample</b> | <b>C 1s (%)</b> | <b>O 1s (%)</b> | <b>S 2p (%)</b> | <b>Si 2p (%)</b> |
|---------------|-----------------|-----------------|-----------------|------------------|
| 0 h           | 71.04           | 23.04           | 1.77            | 4.15             |
| 12 h          | 70.25           | 24.63           | 1.60            | 3.52             |
| 24 h          | 71.52           | 23.08           | 1.69            | 3.71             |

---

Table S1

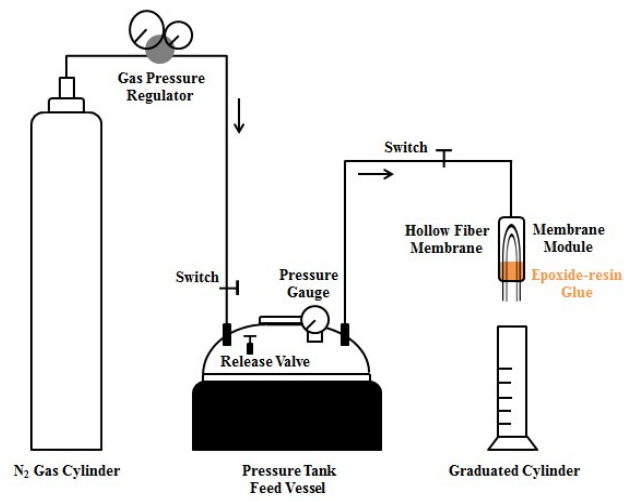

Figure S1

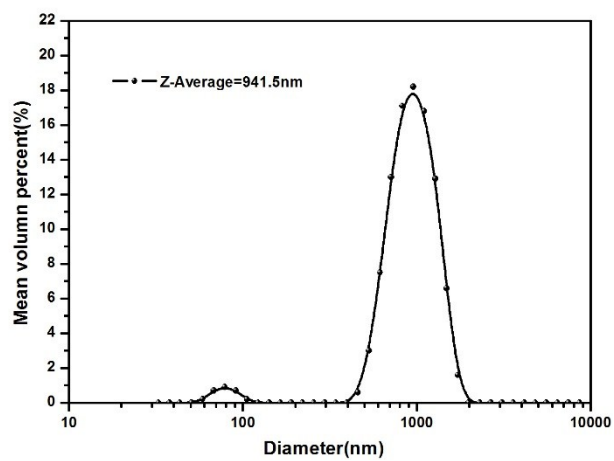

Figure S2

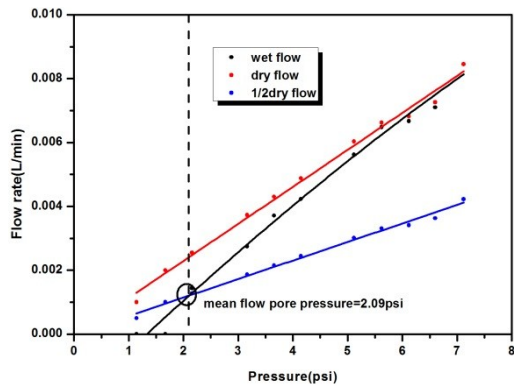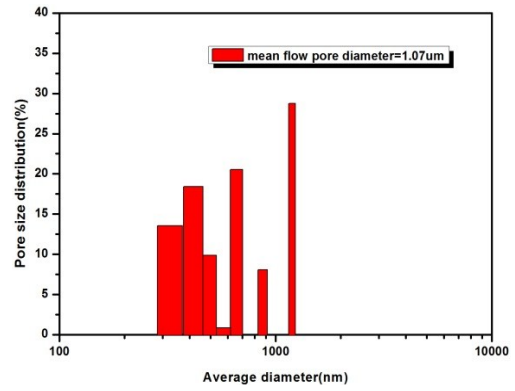

Figure S3

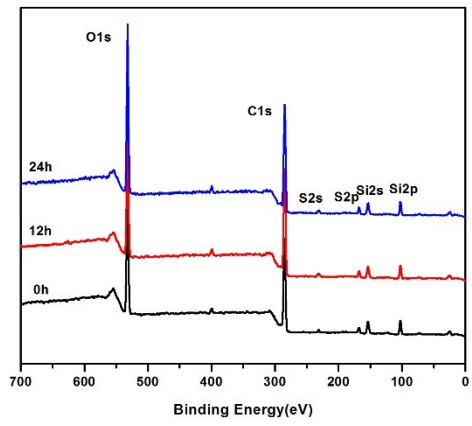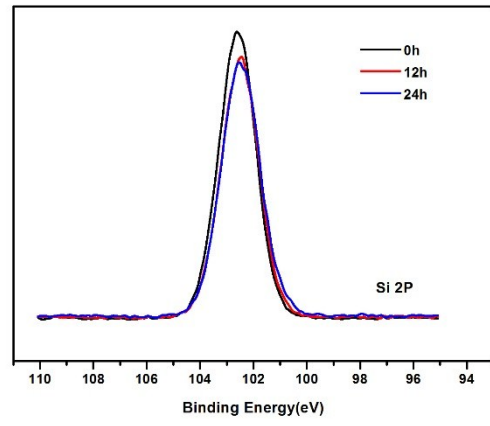

Figure S4

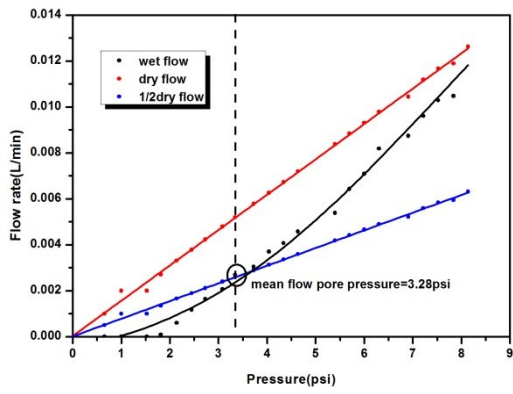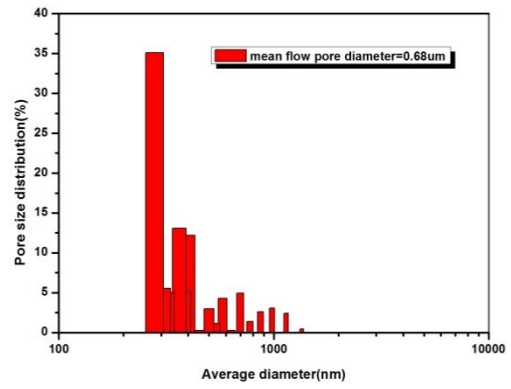

Figure S5



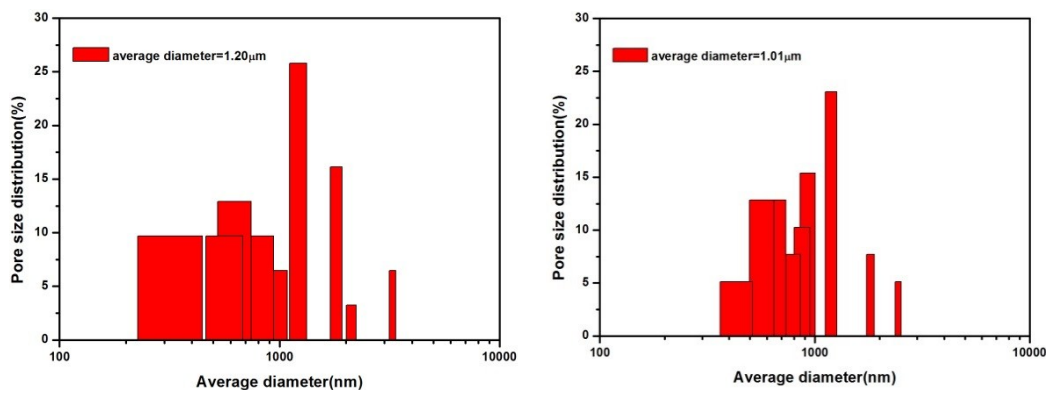

Figure S6

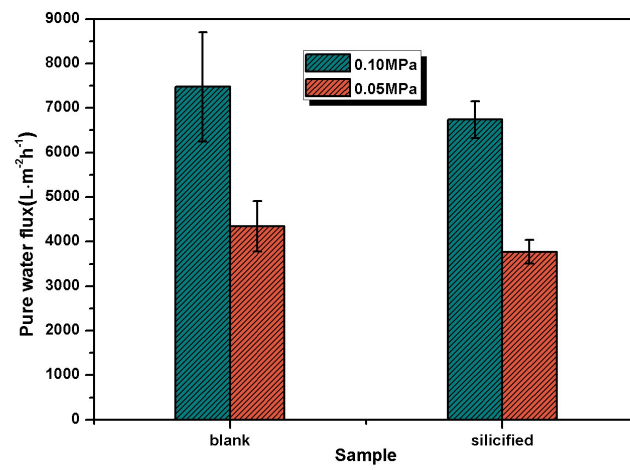

Figure S7

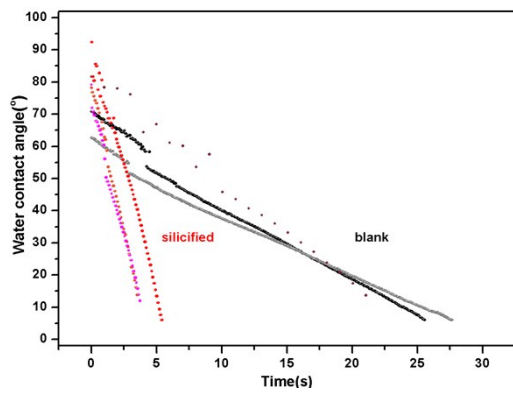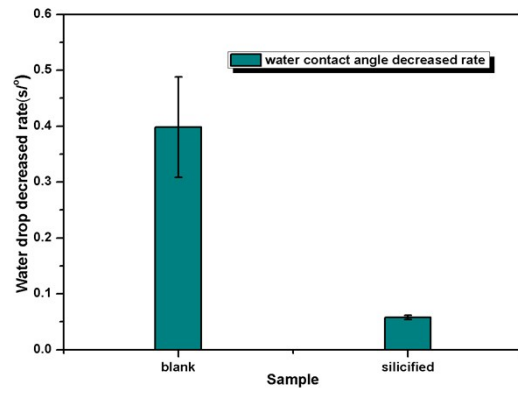

Figure S8

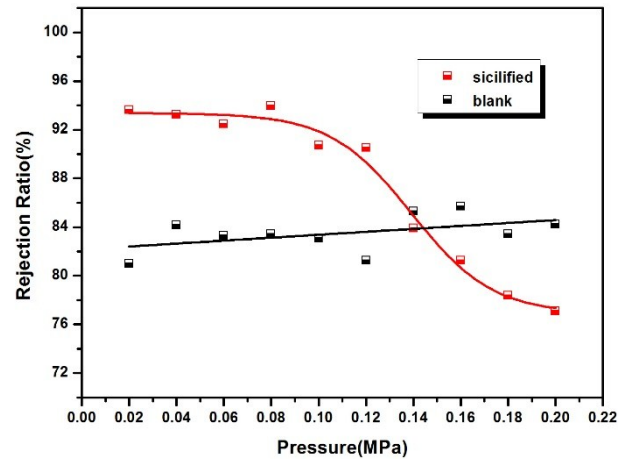

Figure S9
